# Supplementary material for: Coriander (Coriandrum sativum L.) in Combination with Organic Amendments and Arbuscular Mycorrhizal Inoculation: An Efficient Option for the Phytomanagement of Trace Elements-Polluted Soils
Source: MDPI journal article supplement (doi:10.3390/microorganisms10112287), 2022-11-17
Supplement: s1 [file s1]

Figure S1: Water pH in soil vegetated or not with coriander cultivated in presence (I) or in absence of AMF inoculum (NI) and/or without organic amendments (non-amended) or with compost or sewage sludges. Mean  $\pm$  SD. Significant differences between treatments are indicated by different letters at the level of  $\alpha=0.05$ .

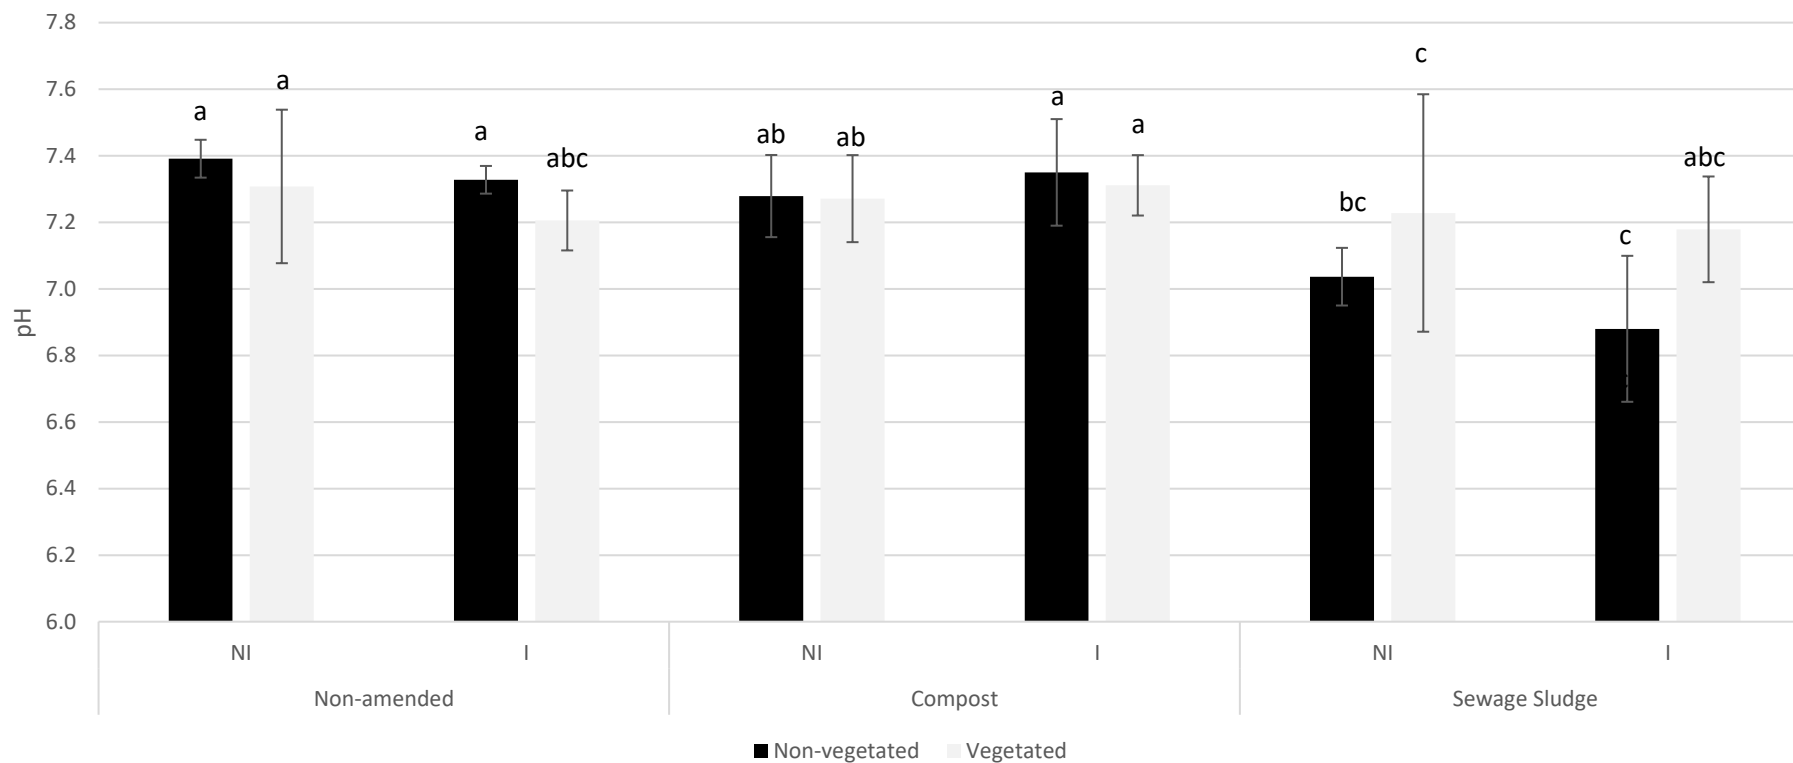

Table S1: Total TE concentrations ( $\mu\text{g/g DS}$ ) in soil vegetated or not (non-vegetated) with coriander cultivated in the presence or not of AMF inoculum (NI/I) and/or without organic amendments (non-amended) or with compost or sewage sludge. Mean  $\pm$  SD. Significant differences between treatments are indicated by different letters at the level of  $\alpha=0.05$ .

|               |               |    | As              | Cr                 | Cd                | Cu                 | Ni                 | Pb                    | Zn                   |
|---------------|---------------|----|-----------------|--------------------|-------------------|--------------------|--------------------|-----------------------|----------------------|
| Non-amended   | Non-vegetated | NI | <5              | 32.85 $\pm$ 0.57 a | 4.92 $\pm$ 0.10 a | 22.15 $\pm$ 0.29 a | 28.92 $\pm$ 7.89 a | 326.45 $\pm$ 13.70 a  | 405.94 $\pm$ 5.12 a  |
|               |               | I  | <5              | 32.45 $\pm$ 0.56 a | 4.83 $\pm$ 0.23 a | 22.19 $\pm$ 0.83 a | 22.46 $\pm$ 1.23 a | 299.26 $\pm$ 10.42 ab | 403.83 $\pm$ 17.96 a |
|               | Vegetated     | NI | <5              | 34.88 $\pm$ 1.96 a | 4.90 $\pm$ 0.05 a | 22.22 $\pm$ 0.31 a | 20.51 $\pm$ 0.12 a | 307.32 $\pm$ 2.50 bc  | 407.97 $\pm$ 2.61 a  |
|               |               | I  | <5              | 31.85 $\pm$ 1.81 a | 4.93 $\pm$ 0.23 a | 22.91 $\pm$ 0.27 a | 22.09 $\pm$ 0.76 a | 304.19 $\pm$ 7.93 ab  | 411.5 1 $\pm$ 9.29 a |
| Compost       | Non-vegetated | NI | 8.9 $\pm$ 6.81  | 31.16 $\pm$ 1.72 a | 5.04 $\pm$ 0.43 a | 23.86 $\pm$ 3.45 a | 29.58 $\pm$ 12.63a | 301.05 $\pm$ 5.62 bc  | 404.65 $\pm$ 14.59 a |
|               |               | I  | <5              | 30.68 $\pm$ 2.23 a | 5.00 $\pm$ 0.11 a | 22.93 $\pm$ 1.64 a | 19.55 $\pm$ 1.00 a | 286.02 $\pm$ 9.33 bc  | 389.17 $\pm$ 16.53 a |
|               | Vegetated     | NI | 8.20 $\pm$ 5.54 | 31.40 $\pm$ 2.28 a | 4.68 $\pm$ 0.13 a | 22.78 $\pm$ 0.65 a | 21.55 $\pm$ 0.51 a | 295.60 $\pm$ 5.77 bc  | 398.43 $\pm$ 12.58 a |
|               |               | I  | <5              | 33.79 $\pm$ 0.24 a | 4.92 $\pm$ 0.34 a | 24.19 $\pm$ 0.49 a | 20.94 $\pm$ 0.38 a | 300.77 $\pm$ 8.00 bc  | 405.70 $\pm$ 7.23 a  |
| Sewage Sludge | Non-vegetated | NI | <5              | 36.63 $\pm$ 6.88 a | 4.69 $\pm$ 0.15 a | 24.66 $\pm$ 1.17 a | 22.53 $\pm$ 4.20 a | 280.20 $\pm$ 8.34 a   | 387.31 $\pm$ 12.45 a |
|               |               | I  | <5              | 31.48 $\pm$ 1.70 a | 4.60 $\pm$ 0.12 a | 25.05 $\pm$ 0.36 a | 20.31 $\pm$ 0.23 a | 296.52 $\pm$ 2.04 bc  | 397.87 $\pm$ 3.86 a  |
|               | Vegetated     | NI | <5              | 34.35 $\pm$ 2.09 a | 4.66 $\pm$ 0.04 a | 24.80 $\pm$ 0.46 a | 21.93 $\pm$ 0.61 a | 296.01 $\pm$ 6.59 bc  | 399.73 $\pm$ 11.38 a |
|               |               | I  | <5              | 32.18 $\pm$ 2.33 a | 4.82 $\pm$ 0.16 a | 25.3 $\pm$ 1.54 a  | 20.69 $\pm$ 0.61 a | 300.76 $\pm$ 6.88 bc  | 403.60 $\pm$ 7.87 a  |

Table S2: TE Concentrations ( $\mu\text{g/g DM}$ ) in coriander shoots, inoculated (I) or non-inoculated (NI) cultivated in non-amended or amended (compost or sewage sludge) conditions. Mean  $\pm$  SD. Significant differences between conditions are indicated by different letters at the level of  $\alpha=0.05$ .

|               |    | As                | Cr                | Cd                 | Cu                  | Ni                 | Pb                 | Zn                  |
|---------------|----|-------------------|-------------------|--------------------|---------------------|--------------------|--------------------|---------------------|
| Non-amended   | NI | 6.14 $\pm$ 0.25 a | 1.23 $\pm$ 0.05 a | 12.44 $\pm$ 4.54 a | 5.91 $\pm$ 0.82 bc  | 1.38 $\pm$ 0.18 ab | 7.39 $\pm$ 0.71 a  | 43.48 $\pm$ 13.95 a |
|               | I  | 5.98 $\pm$ 0.19 a | 1.20 $\pm$ 0.04 a | 8.47 $\pm$ 0.52 ab | 4.91 $\pm$ 1.12 bc  | 1.20 $\pm$ 0.04 b  | 3.83 $\pm$ 0.95 ab | 47.64 $\pm$ 6.31 a  |
| Compost       | NI | 6.25 $\pm$ 0.16 a | 1.25 $\pm$ 0.03 a | 6.91 $\pm$ 1.16 ab | 5.14 $\pm$ 0.49 bc  | 1.39 $\pm$ 0.28 ab | 3.43 $\pm$ 0.76 b  | 45.35 $\pm$ 15.19 a |
|               | I  | 6.23 $\pm$ 0.05 a | 1.25 $\pm$ 0.01 a | 6.38 $\pm$ 1.62 b  | 4.52 $\pm$ 0.87 c   | 1.63 $\pm$ 0.67 ab | 2.92 $\pm$ 0.68 b  | 33.82 $\pm$ 5.15 a  |
| Sewage sludge | NI | 6.11 $\pm$ 0.28 a | 1.22 $\pm$ 0.06 a | 5.87 $\pm$ 0.84 b  | 10.18 $\pm$ 3.73 ab | 1.24 $\pm$ 0.03 ab | 4.04 $\pm$ 1.55 b  | 72.78 $\pm$ 27.39 a |
|               | I  | 6.11 $\pm$ 0.26 a | 1.22 $\pm$ 0.05 a | 6.16 $\pm$ 1.71 b  | 11.86 $\pm$ 2.30 a  | 1.99 $\pm$ 0.74 a  | 3.25 $\pm$ 1.55 b  | 68.65 $\pm$ 13.72 a |
